# Supplementary material
Source: PubMed Central journal article supplement (PMC2797162)
Supplement: supp_M109.018549_jbc.M109.018549-1.pdf [file supp_M109.018549_jbc.M109.018549-1.pdf]

| Sequences          | C91                  | C128                   | C172                 |
|--------------------|----------------------|------------------------|----------------------|
| 1a.H77.AF009606    | YPWPLYGNEGCGWAGWLLSP | NLGKVIDTLTTCGFADLMGYI  | VNYATGNLPGCSFSIFLLAL |
| 1b.589.AY070174    | YPWPLYGNEGCGWAGWLLSP | NLGKVIDTLTTCGFADLMGYI  | VNYATGNLPGCSFSIFLLAL |
| 1c.HC-G9.D14853    | YPWPLYGNEGCGWAGWLLSP | NLGKVIDTLTTCGFADLMGYI  | VNYATGNLPGCSFSIFLLAL |
| 1g.1804.AM910652   | YPWPLYGNEGCGWAGWLLSP | NLGKVIDTLTTCGFADLMGYI  | VNYATGNLPGCSFSIFLLAL |
| 2a.HCJ6.D00944     | YPWPLYGNEGLGWAGWLLSP | NVGKVIDTLTTCGFADLMGYI  | VNFATGNLPGCSFSIFLLAL |
| 2a.JFH1.AB047639   | YPWPLYGNEGLGWAGWLLSP | NVGKVIDTLTTCGFADLMGYI  | VNYATGNLPGFPFSIFLLAL |
| 2b.DK11.U10190     | YPWPLYGNEGCGWAGWLLSP | NLGKVIDTITTCGFADLMGYI  | INYATGNLPGCSFSIFLLAL |
| 2c.BE121.L38319    | YPWPLYGNEGLGWAGWLLSP | NLGKVIDTLTTCGFADLMGYI  | INYATGNLPGCSFSIFLLAL |
| 2d.NNE92.L29631    | YPWPLYGNEGLGWAGWLLSP | NLGKVIDTLTTCGFADLMGYI  | INYATGNLPGCSFSIFLLAL |
| 2e.JK020.D49745    | YPWPLYGNEGLGWAGWLLSP | NLGKVIDTLTTCGFADLMGYI  | INYATGNLPGCSFSIFLLAL |
| 2f.JK081.D49754    | YPWPLYGNEGLGWAGWLLSP | NLGKVIDTLTTCGFADLMGYI  | INYATGNLPGCSFSIFLLTL |
| 2i.D54.DQ155561    | YPWPLYGNEGLGWAGWLLSP | NLGKVIDTLTTCGFADLMGYI  | INYATGNLPGCSFSIFLLAL |
| 2k.VAT96.AB031663  | YPWPLYGNEGLGWAGWLLSP | NLGKVIDTLTTCGFADLMGYI  | INYATGNLPGCSFSIFLLAL |
| 3a.HCVCENS1.X76918 | YPWPLYGNEGCGWAGWLLSP | NLGKVIDTLTTCGFADLMGYI  | INFATGNLPGCSFSIFLLAL |
| 3b.NB134.AY231588  | YPWPLYGNEGCGWAGWLLPP | NLGKVIDTLTTCGFADLMGYI  | VNYATGNLPGCSFSIFLLAL |
| 3c.NE048.D16612    | YPWPLYGNEGCGWAGWLLSP | NLGKVIDTLTTCGFADLMGYI  | INFATGNLPGCSFSIFLLAL |
| 3d.NE274.D16620    | YPWPLYGNEGCGWAGWLLSP | NLGKVIDTLTTCGFADLMGYI  | INFATGNLPGCSFSIFLLAL |
| 3e.NE145.D16618    | YPWPLYGNEGCGWAGWLLSP | NLGKVIDTLTTCGFADLMGYI  | INFATGNLPGCSFSIFLLAL |
| 3f.NE125.D16614    | YPWPLYGNEGCGWAGWLLSP | NLGKVIDTLTTCGFADLMGYI  | INFATGNLPGCSFSIFLLAL |
| 3h.QC29.U33437     | YAWPLYGNEGCGWAGWLLSP | NLGKIIDLTLTTCGFADLMGYI | VNYATGNLPGCSFSIFLLAI |
| 3i.QC100.AY434137  | YPWPLYGNEGCGWAGWLLSP | NLGKVIDTLTTCGFADLMGYI  | INFATGNLPGCSFSIFLLAL |
| 3k.JK030.D49747    | YPWPLYGNEGCGWAGWLLSP | NLGKVIDTLTTCGFADLMGYI  | INFATGNLPGCSFSIFLLAL |
| 4a.AR45.AF308576   | YPWPLYGNEGCGWAGWLLSP | NLGKLIESLTCGFADLMGYI   | INYATGNLPGCSFSIFLLAL |
| 4c.Z6.U10238       | YPWPLYGNEGCGWAGWLLSP | NLGKVIDTLTTCGFADLMGYI  | INYATGNLPGCSFSIFLLAL |
| 4d.AR46.AF308577   | YPWPLYXNEGCGWAGWLLSP | NLGKVIDTLTTCGFADLMGYI  | VNYATGNLPGCSXSIFLLAL |
| 4e.CAM600.L29587   | YPWPLYGNEGCGWAGWLLSP | NLGKVIDTLTTCGFADLMGYI  | INYATGNLPGCSFSIFLLAL |
| 4f.FR12.L38332     | YPWPFNGNEGCGWAGWLLSP | NLGKVIDTLTTCGFADLMGYI  | INYATGNIPGCSFSIFLLAL |
| 4r.Z4.U10236       | YPWPLYGNEGCGWAGWLLSP | NLGKVIDTLTTCGFADLMGYI  | INYATGNLPGCSFSIFLLAL |
| 5a.BE95.L29577     | YPWPLYANEGLGWAGWLLSP | NLGKVIDTLTTCGFADLMGYI  | VNYATGNLPGCSFSIFILAL |
| 6a.QC26.U33435     | YPWPLYGNEGCGWAGWLLSP | NLGKVIDTLTTCGFADLMGYI  | INYATGNLPGCSFSIFLLAL |
| 6b.TH580.D37841    | YPWPLYGNEGCGWAGWLMSP | NLGKVIDTLTTCGLADLMGYI  | INYATGNLPGCSFSIFILAL |
| 6c.TH846.D37843R   | YPWPLYGNEGCGWAGWLLSP | NLGKVIDTLTTCGFADLMGYI  | INYATGNLPGCSFSIFLLAL |
| 6d.VN235.D88467    | YPWPLYGNEGCGWMGWLLSP | NLGKVIDTLTTCGFADLMGYI  | INYATGNLPGCSFSIFLLAL |
| 6f.TH271.D37844    | YPWPLYGNEGCGWAGWLLSP | NLGKVIDTLTTCGFADLMGYI  | INYATGNLPGCSFSIFLLAL |
| 6g.JK046.D49748    | YPWPLYGNEGCGWAGWLLSP | NLGKVIDTLTTCGFADLMGYI  | INYATGNLPGCSFSIFLLAL |
| 6h.FR1.L38331      | YAWPLYGNEGCGWAGWLLSP | NLGKVIDTLTTCGLADLMGYI  | VNYATGNLPGCSFSIFLLAL |
| 6i.TH555.D37849    | YPWPLYGNEGCGWAGWLLSP | NLGKVIDTLTTCGLADLMGYI  | VNYATGNLPGCSFSIFLLAL |
| 6j.TH553.D37848    | YPWPLYGNEGCGWAGWLPSP | NLGKVIDTLTTCGLADLMGYI  | VNYATGNLPGCSFSIFILAL |
| 6k.KM45.AY878650   | YPWPLYGNEGCGWAGWLLSP | NLGKVIDTLTTCGLADLMGYI  | VNYATGNLPGCSFSIFILAL |
| 6l.VN507.D88470    | YPWPLYGNEGCGWAGWLLSP | NMGKVIDSLTTCGFADLMGYI  | INYATGNLPGCSFSIFLLAL |
| 6m.B4/92.D63943    | YAWPLYGNEGCGWAGWLLSP | NLGKVIDTITTCGFADLMGYI  | INYATGNLPGCSFSIFLLAL |
| 6n.D97/93.D63946   | YPWPLYGNEGCGWAGWLLSP | NLGKVIDTLTCDLADLMGYI   | INYATGNLPGCSFSIFLLAL |
| 6o.QC30.U52811R    | YPWPLYGNEGCGWAGWLLSP | NLGRVIDTITTCGLADLMGYI  | INYATGNLPGCSFSIFLLAL |
| 6p.VN12.L38340     | YPWPLYGNEGCGWAGWLLSP | NLGKVIDTLTTCGFADLMGYI  | VNYATGNLPGCSFSIFLLAL |
| 7a.QC69.EF108306C  | YPWPLYGNEGCGWAGWLLSP | NLGKVIDTLTTCGFADLMEYI  | VNYATGNLPGCSFSIFLLAL |

Supplementary Table 1. Sequences alignment of HCV core protein of different genotypes.
